# Supplementary material
Source: Springer Nature journal article supplement (https://www.springermedizin.de/resource/supplementary/12885_2013_4478_MOESM4_ESM.pdf/9466528)

**A**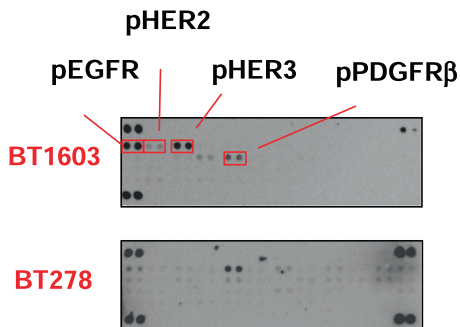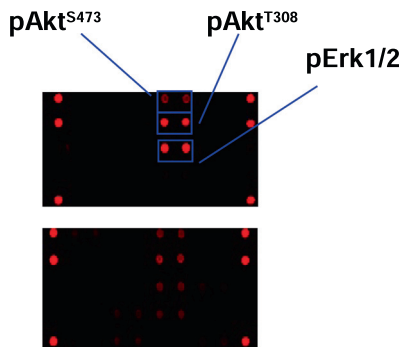**B**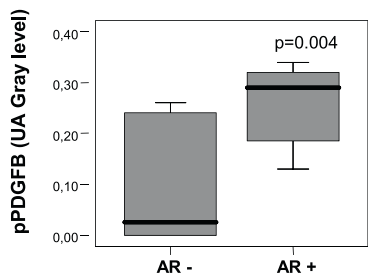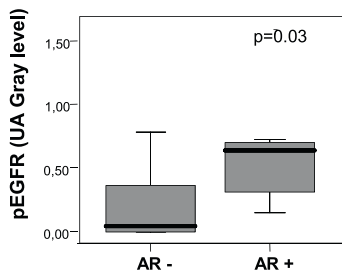**C**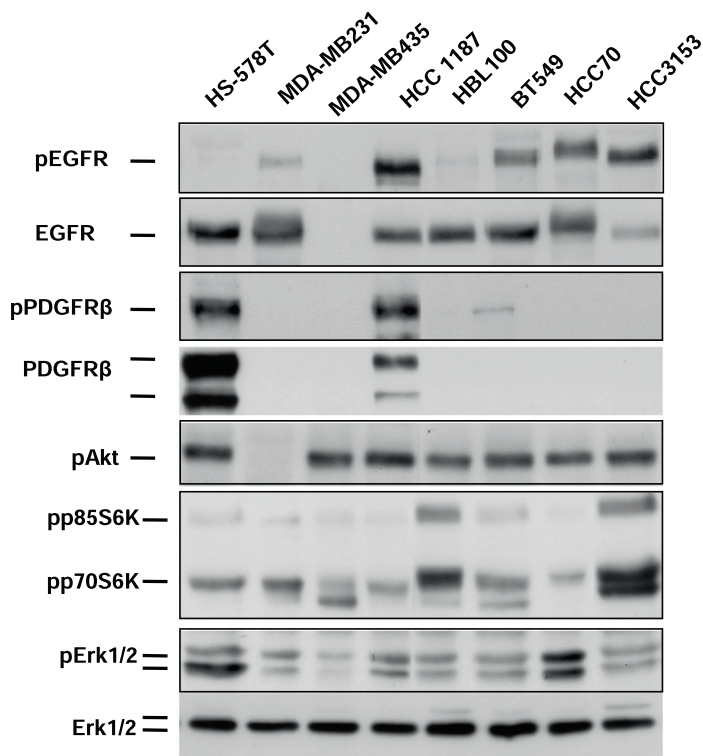

Supplement: MOESM4 [file 9466528]
